# Supplementary material for: Pharmacogenetic—Whole blood and intracellular pharmacokinetic—Pharmacodynamic (PG-PK2-PD) relationship of tacrolimus in liver transplant recipients
Source: PubMed Central journal article supplement (PMC7067455; doi:10.1371/journal.pone.0230195), 2020-03-12

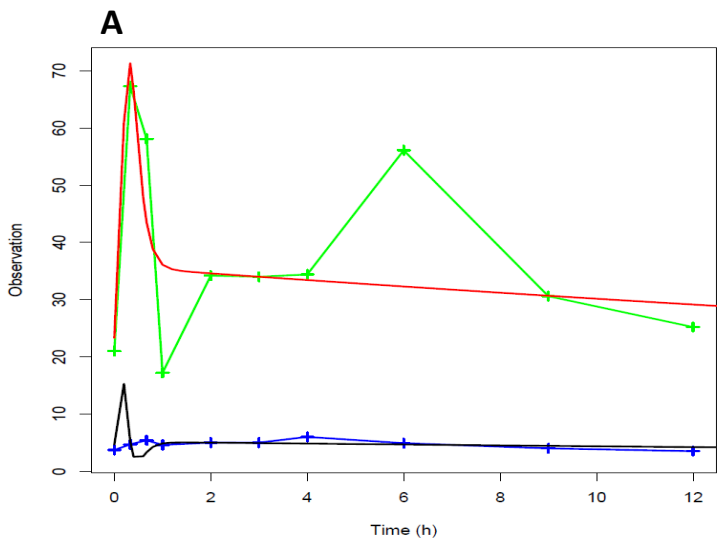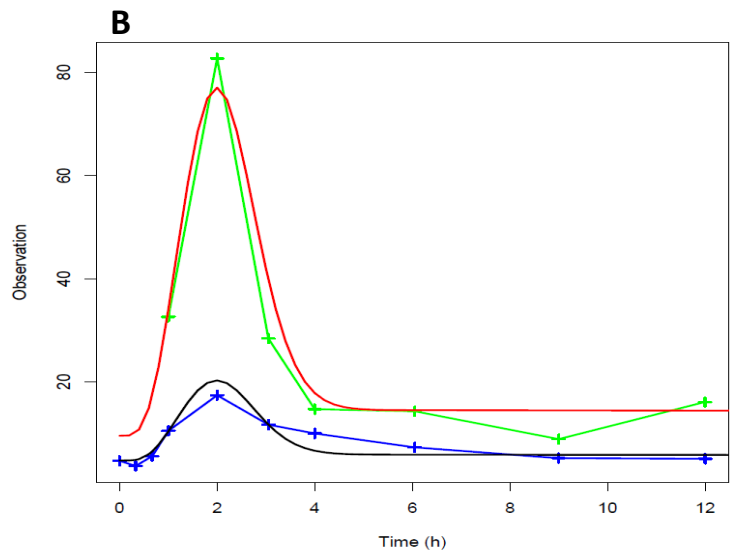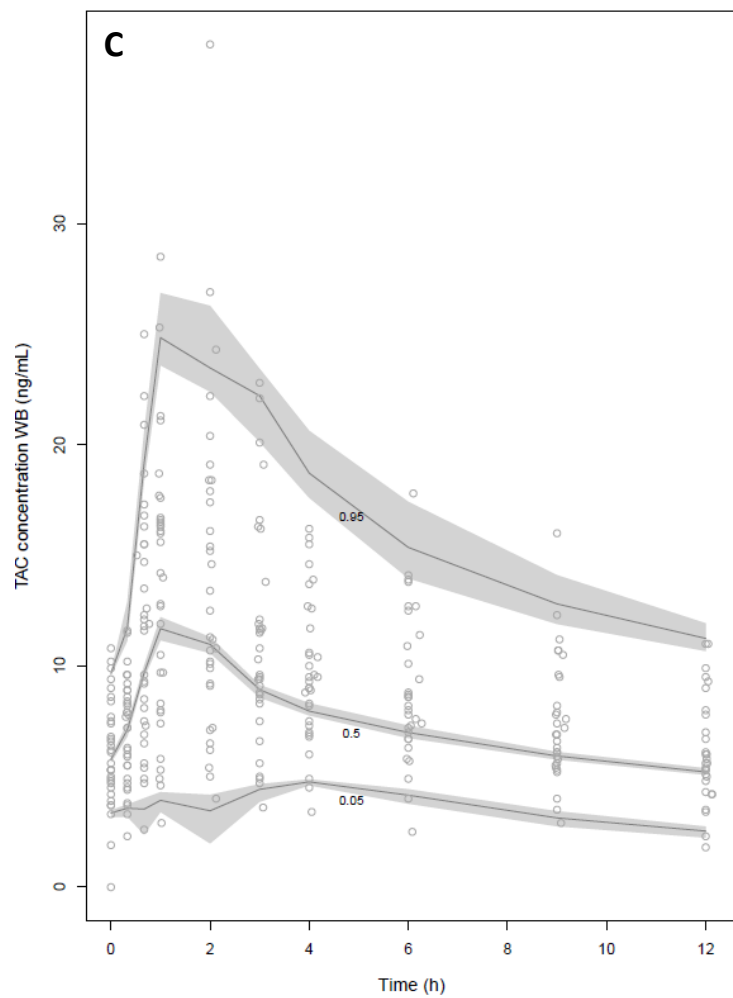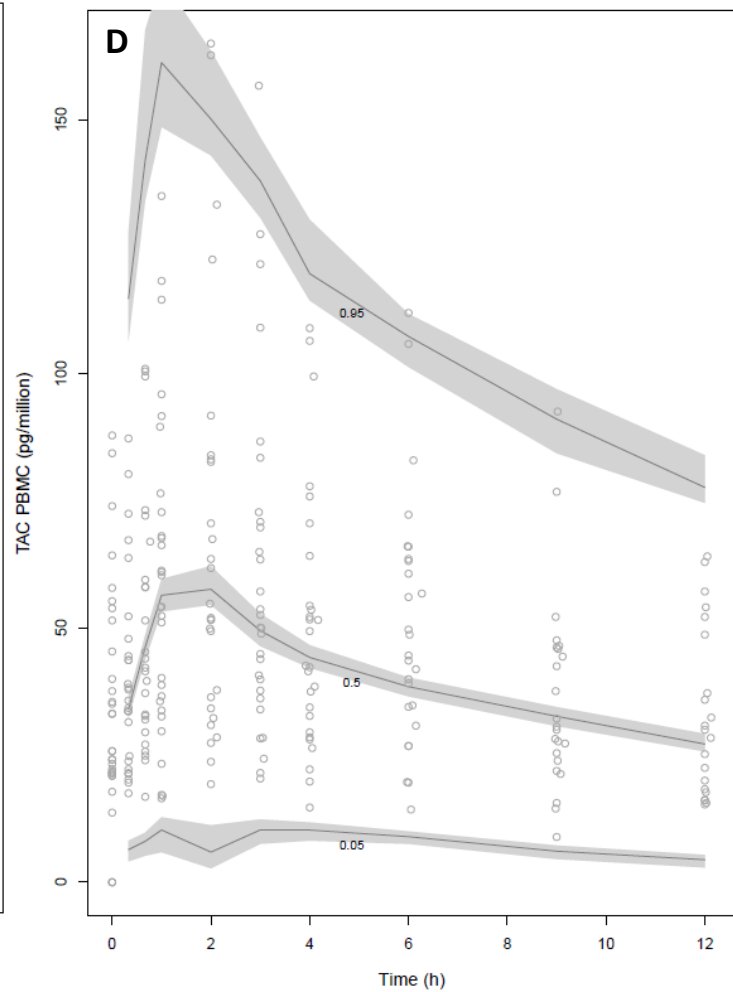

Supplement: pone.0230195.s001.pdf [file pone.0230195.s001.pdf]
